# Supplementary material for: Divergent microbial communities in groundwater and overlying soils exhibit functional redundancy for plant-polysaccharide degradation
Source: PubMed Central journal article supplement (PMC6415789; doi:10.1371/journal.pone.0212937), 2019-03-13
Supplement: pone.0212937.s001.pdf [file pone.0212937.s001.pdf]

1  
2  
3  
4  
5  
6  
7  
8  
9  
10  
11  
12  
13  
14  
15  
16

# **Divergent microbial communities in groundwater and overlying soils exhibit functional redundancy for plant-polysaccharide degradation**

Martin Taubert<sup>1,\*</sup>, Jan Stähly<sup>1</sup>, Steffen Kolb<sup>1,2</sup>, Kirsten Küsel<sup>1,3</sup>

<sup>1</sup>Aquatic Geomicrobiology, Institute of Biodiversity, Friedrich Schiller University Jena, Jena, Germany

<sup>2</sup>Microbial Biogeochemistry, RA Landscape Processes, Leibniz Centre for Agricultural Landscape Research (ZALF), Müncheberg, Germany

<sup>3</sup>German Centre for Integrative Biodiversity Research (iDiv) Halle-Jena-Leipzig, Leipzig, Germany

\*Corresponding author

E-mail: martin.taubert@uni-jena.de (MT)

Running title: Plant polysaccharide degradation in groundwater and soil

17

## 18 **Materials and Methods**

### 19 **Monitoring of physicochemical parameters in microcosms during** 20 **SIP incubation**

21 During incubation, the concentration of total inorganic carbon (TIC) as well as pressure and  
22 pH were monitored every 1 to 2 weeks. Quantification of TIC was based on CO<sub>2</sub> partial  
23 pressure in the headspace of the incubations determined by GC measurements on a Hewlett  
24 Packard 5890 instrument (Hewlett Packard, Palo Alto, CA, USA) with a thermal conductivity  
25 detector, equipped with a Chromosorb 102 column (2 m x 1/8", Alltech, Unterhaching,  
26 Germany). The injector temperature was set to 150 °C and the detector temperature to  
27 175 °C. A volume of 100 µl from the headspace of the incubations was injected and  
28 separated with Helium as carrier gas at a pressure of 22 psi and 50 °C, CO<sub>2</sub> was detected  
29 after 1:35 min. Pressure in the incubations was measured with a portable digital pressure  
30 meter GMH 3111 (Greisinger electronic, Regenstauf, Germany) before taking samples for GC  
31 measurements, and pH was measured with a WTW Sentix Mic probe attached to a WTW pH  
32 330 pH-meter (WTW electronic, Graz, Austria). Pressure and pH were used to calculate the  
33 concentrations of dissolved hydrogen carbonate for determination of TIC as previously  
34 described (1).

### 35 **Bacterial 16S rRNA gene amplicon sequencing by LGC**

36 Illumina MiSeq amplicon sequencing targeting bacterial 16S rRNA genes was performed on  
37 all samples using the primer combinations Bakt\_785R/Bakt\_341F (2). Illumina MiSeq  
38 amplicon sequencing was carried out by LGC Genomics GmbH (Berlin, Germany). The PCRs  
39 included about 5 ng of DNA extract, 15 pmol of each forward primer 341F 5'-  
40 NNNNNNNNNNTCTACGGGNGGCWGCAG and reverse primer 785R 5'-

41 NNNNNNNNNNTGACTACHVGGGTATCTAAKCC in 20 uL volume of 1 x MyTaq buffer  
42 containing 1.5 units MyTaq DNA polymerase (Bioline) and 2 µl of BioStabII PCR Enhancer  
43 (Sigma). For each sample, the forward and reverse primers had the same 10-nt barcode  
44 sequence, resulting in an amplicon size of approximately 470 bp, including the V3 and V4  
45 region of the bacterial 16S rRNA gene. PCRs were carried out for 30 cycles using the  
46 following parameters: 2 min 96 °C pre-denaturation; 96 °C for 15 s, 50 °C for 30 s, 70 °C for  
47 90 s. DNA concentration of amplicons of interest was determined by gel electrophoresis .  
48 About 20 ng amplicon DNA of each sample were pooled for up to 48 samples carrying  
49 different barcodes. If needed PCRs showing low yields were further amplified for 5 cycles.  
50 The amplicon pools were purified with one volume AMPure XP beads (Agencourt) to remove  
51 primer dimer and other small mispriming products, followed by an additional purification on  
52 MinElute columns (Qiagen). About 100 ng of each purified amplicon pool DNA was used to  
53 construct Illumina libraries using the Ovation Rapid DR Multiplex System 1-96 (NuGEN).  
54 Illumina libraries were pooled and size selected by preparative gel electrophoresis.  
55 Sequencing was done on an Illumina MiSeq using V3 Chemistry (Illumina).

## 56 **References**

- 57 1. Küsel K, Drake HL. Effects of environmental parameters on the formation and  
58 turnover of acetate by forest soils. *Appl Environ Microb.* 1995;61(10):3667-75.
- 59 2. Herlemann DPR, Labrenz M, Jürgens K, Bertilsson S, Waniek JJ, Andersson AF.  
60 Transitions in bacterial communities along the 2000 km salinity gradient of the Baltic Sea.  
61 *ISME J.* 2011;5(10):1571-9.

62
