# Supplementary material for: Divergent microbial communities in groundwater and overlying soils exhibit functional redundancy for plant-polysaccharide degradation
Source: PubMed Central journal article supplement (PMC6415789; doi:10.1371/journal.pone.0212937), 2019-03-13
Supplement: pone.0212937.s003.pdf [file pone.0212937.s003.pdf]

bacterial 16S rRNA gene copies

|             |                                     |                  |
|-------------|-------------------------------------|------------------|
| groundwater | $1.03 * 10^7 \pm 3.09 * 10^5$       | $L^{-1}$         |
| soil        | $1.24 * 10^{13} \pm 4.99 * 10^{12}$ | $kg^{-1}$        |
| groundwater | $2.598 * 10^9 \pm 7.73 * 10^7$      | $microcosm^{-1}$ |
| microcosm   | $1.24 * 10^{11} \pm 4.99 * 10^{10}$ | $microcosm^{-1}$ |
