# Supplementary material for: Divergent microbial communities in groundwater and overlying soils exhibit functional redundancy for plant-polysaccharide degradation
Source: PubMed Central journal article supplement (PMC6415789; doi:10.1371/journal.pone.0212937), 2019-03-13
Supplement: pone.0212937.s004.pdf [file pone.0212937.s004.pdf]

| OTU      | Taxonomy         |                     |                               | Groundwater microcosms |        | Soil microcosms  |        |
|----------|------------------|---------------------|-------------------------------|------------------------|--------|------------------|--------|
|          | Phylum           | Class               | Highest level                 | (hemi) cellulose       | starch | (hemi) cellulose | starch |
| Otu00204 | Acidobacteria    | -                   | Paludibaculum                 |                        | ***    |                  |        |
| Otu00109 | Acidobacteria    | -                   | Subgroup 2                    |                        |        | ***              | ***    |
| Otu00130 | Acidobacteria    | -                   | Subgroup 2                    |                        |        |                  | ***    |
| Otu00172 | Acidobacteria    | -                   | Subgroup 2                    |                        |        |                  | ***    |
| Otu00239 | Actinobacteria   | -                   | Mycobacterium                 |                        |        | **               |        |
| Otu00112 | Actinobacteria   | -                   | Cellulomonas                  |                        | **     |                  |        |
| Otu00018 | Actinobacteria   | -                   | Microbacterium                |                        | ***    |                  |        |
| Otu00007 | Actinobacteria   | -                   | Propioniceella                | **                     | ***    |                  |        |
| Otu00088 | Actinobacteria   | -                   | Propioniceella                |                        | ***    |                  |        |
| Otu00001 | Bacteroidetes    | Bacteroidia         | Paludibacter                  | ***                    |        |                  |        |
| Otu00057 | Bacteroidetes    | Cytophagia          | Emticia                       |                        | ***    |                  |        |
| Otu00024 | Bacteroidetes    | Cytophagia          | Leadbetterella                |                        | ***    |                  |        |
| Otu00056 | Bacteroidetes    | Flavobacteriia      | Flavobacterium                |                        | *      |                  |        |
| Otu00327 | Bacteroidetes    | Flavobacteriia      | Flavobacterium                |                        | *      |                  |        |
| Otu00011 | Bacteroidetes    | Flavobacteriia      | Flavobacterium                | *                      |        |                  |        |
| Otu00019 | Bacteroidetes    | Sphingobacteriia    | Sediminibacterium             |                        |        | ***              |        |
| Otu00220 | Bacteroidetes    | Sphingobacteriia    | Chitinophagaceae              |                        |        |                  | *      |
| Otu00066 | Bacteroidetes    | Sphingobacteriia    | env.OPS 17                    |                        |        |                  | ***    |
| Otu00229 | Bacteroidetes    | Sphingobacteriia    | NS11-12 marine group          |                        | **     |                  |        |
| Otu00026 | Bacteroidetes    | Sphingobacteriia    | Mucilaginibacter              |                        |        |                  | ***    |
| Otu00068 | Bacteroidetes    | Sphingobacteriia    | Mucilaginibacter              |                        |        |                  | ***    |
| Otu00063 | Bacteroidetes    | Sphingobacteriia    | Mucilaginibacter              |                        |        | ***              |        |
| Otu00031 | Bacteroidetes    | Sphingobacteriia    | Mucilaginibacter              |                        |        | *                |        |
| Otu00110 | Bacteroidetes    | Sphingobacteriia    | Pedobacter                    | *                      |        |                  |        |
| Otu00864 | Bacteroidetes    | Sphingobacteriia    | Sphingobacteriales            |                        | *      |                  |        |
| Otu00107 | Bacteroidetes    | Sphingobacteriia    | Sphingobacteriales            | *                      |        |                  |        |
| Otu00044 | Bacteroidetes    | Sphingobacteriia    | Sphingobacteriales            |                        |        | ***              | ***    |
| Otu00203 | Bacteroidetes    | Sphingobacteriia    | Sphingobacteriales            |                        |        | ***              |        |
| Otu00386 | Bacteroidetes    | -                   | WCHB1-32                      |                        | ***    |                  |        |
| Otu00081 | Chlamydiae       | -                   | cvE6                          |                        | *      |                  |        |
| Otu00228 | Chlamydiae       | -                   | Simkaniaceae                  |                        |        |                  | ***    |
| Otu00016 | Firmicutes       | Clostridia          | Clostridiaceae                |                        |        | ***              | ***    |
| Otu00023 | Firmicutes       | Clostridia          | Clostridiaceae                |                        |        | ***              | ***    |
| Otu00075 | Firmicutes       | Clostridia          | Clostridiaceae                |                        |        |                  | ***    |
| Otu00086 | Firmicutes       | Clostridia          | Clostridiaceae                |                        |        |                  | ***    |
| Otu00197 | Firmicutes       | Clostridia          | Clostridiaceae                |                        |        |                  | **     |
| Otu00010 | Firmicutes       | Clostridia          | Clostridiaceae                |                        |        |                  | ***    |
| Otu00159 | Firmicutes       | Clostridia          | Clostridiaceae                |                        |        |                  | ***    |
| Otu00097 | Firmicutes       | Clostridia          | Clostridium                   |                        |        |                  | ***    |
| Otu00076 | Firmicutes       | Clostridia          | Clostridium                   |                        |        | ***              |        |
| Otu00002 | Firmicutes       | Clostridia          | Clostridium                   |                        |        | ***              | ***    |
| Otu00036 | Firmicutes       | Clostridia          | Fonticella                    |                        |        | ***              |        |
| Otu00045 | Firmicutes       | Clostridia          | Fonticella                    |                        |        | ***              |        |
| Otu00083 | Firmicutes       | Clostridia          | Clostridiales vadinBB60 group |                        |        | ***              |        |
| Otu00236 | Firmicutes       | Clostridia          | Ruminiclostridium             |                        |        | **               |        |
| Otu00366 | Firmicutes       | Clostridia          | Ruminiclostridium             |                        |        | *                |        |
| Otu00186 | Firmicutes       | Clostridia          | Ruminiclostridium             |                        |        | ***              |        |
| Otu00282 | Firmicutes       | Clostridia          | Ruminococcaceae               |                        |        | ***              |        |
| Otu00275 | Firmicutes       | Clostridia          | Ruminococcaceae               |                        |        | *                |        |
| Otu00426 | Firmicutes       | Clostridia          | Ruminococcaceae               |                        |        | *                |        |
| Otu00072 | Firmicutes       | Clostridia          | ODP1230B8.23                  |                        |        | ***              | *      |
| Otu00073 | Firmicutes       | Clostridia          | ODP1230B8.23                  |                        |        | ***              | ***    |
| Otu00125 | Firmicutes       | Negativicutes       | Veillonellaceae               | *                      |        |                  |        |
| Otu00136 | Firmicutes       | Clostridia          | Clostridia                    |                        |        | *                | *      |
| Otu00027 | Parcubacteria    | -                   | Parcubacteria                 | ***                    |        |                  |        |
| Otu00139 | Planctomycetes   | Planctomycetacia    | Isosphaera                    |                        |        | ***              |        |
| Otu00141 | Planctomycetes   | Planctomycetacia    | Planctomyces                  |                        |        | ***              |        |
| Otu00042 | Proteobacteria   | Alphaproteobacteria | Caulobacter                   |                        | ***    |                  |        |
| Otu00060 | Proteobacteria   | Alphaproteobacteria | Bradyrhizobiaceae             |                        |        |                  | ***    |
| Otu00334 | Proteobacteria   | Alphaproteobacteria | Ancalomicrobium               |                        | ***    |                  |        |
| Otu00051 | Proteobacteria   | Alphaproteobacteria | Pleomorphomonas               |                        | ***    |                  |        |
| Otu00251 | Proteobacteria   | Alphaproteobacteria | Roseiarcus                    |                        |        | ***              |        |
| Otu00062 | Proteobacteria   | Alphaproteobacteria | Variibacter                   |                        |        | ***              | *      |
| Otu00093 | Proteobacteria   | Alphaproteobacteria | DA111                         |                        |        | ***              |        |
| Otu01177 | Proteobacteria   | Gammaproteobacteria | CHAB-XI-27                    |                        | ***    |                  |        |
| Otu00013 | Saccharibacteria | -                   | Saccharibacteria              | ***                    | ***    |                  |        |
| Otu00005 | Saccharibacteria | -                   | Saccharibacteria              |                        | **     |                  |        |
| Otu00205 | Saccharibacteria | -                   | Saccharibacteria              | ***                    |        |                  |        |
| Otu00318 | Verrucomicrobia  | Opitutae            | Opitutus                      |                        | ***    |                  |        |
| Otu00038 | Verrucomicrobia  | Spartobacteria      | Terrimicrobium                |                        | ***    |                  |        |
| Otu00176 | Verrucomicrobia  | Spartobacteria      | DA101 soil group              |                        |        | *                |        |
